# Supplementary material for: Methicillin-ResistantStaphylococcus aureusDisease in Three Communities
Source: Atypon-hosted journal article supplement (doi:10.1056/nejmoa043252), 2005-04-06
Supplement: 1436sa1.pdf [file 1436sa1.pdf]

## Supplementary Appendix

This appendix has been provided by the authors to give readers additional information about their work.

Supplement to: Fridkin SK, Hageman JC, Morrison M, et al. Methicillin-resistant *Staphylococcus aureus* disease in three communities. N Engl J Med 2005;352:1436-44.

Table 1W. Source and Susceptibility of Isolates from Cases of CA-MRSA Disease, as Reported From Clinical Microbiology Laboratories, by Confirmation Status, Atlanta, Baltimore, and Minnesota ABCs CA-MRSA Surveillance Study, 2001-2002

| Source if isolates           | Status*           |       |                   |      | P-value |
|------------------------------|-------------------|-------|-------------------|------|---------|
|                              | Confirmed (N=575) |       | Probable (N=1072) |      |         |
|                              | No.               | %     | No.               | %    |         |
| Sterile site**               | 23                | 4.0   | 73                | 6.8  | 0.21    |
| Surgical                     | 28                | 4.9   | 49                | 4.6  | 0.80    |
| Skin                         | 388               | 67.4  | 740               | 69.0 | 0.45    |
| Sputum                       | 17                | 3.1   | 38                | 3.6  | 0.55    |
| Urine                        | 40                | 7.3   | 81                | 7.6  | 0.77    |
| Ear                          | 17                | 2.7   | 25                | 2.3  | 0.63    |
| Eye                          | 8                 | 1.4   | 9                 | 0.8  | 0.21    |
| Susceptibility of isolates † |                   |       |                   |      |         |
| Ciprofloxacin                | 233               | 65.3  | 327               | 64.9 | 0.91    |
| Clindamycin                  | 415               | 85.4  | 714               | 87.6 | 0.25    |
| Erythromycin                 | 99                | 21.8  | 120               | 15.4 | 0.004   |
| Gentamicin                   | 235               | 96.3  | 444               | 96.7 | 0.77    |
| Rifampin                     | 347               | 97.5  | 520               | 97.9 | 0.65    |
| Tetracycline                 | 348               | 88.8  | 584               | 87.0 | 0.40    |
| TMP/Sulfa                    | 460               | 96.4  | 718               | 96.9 | 0.66    |
| Vancomycin‡                  | 479               | 100.0 | 864               | 99.8 | 0.29    |

|              |    |      |     |       |      |
|--------------|----|------|-----|-------|------|
| Linezolid    | 6  | 85.7 | 18  | 100.0 | 0.10 |
| Levofloxacin | 70 | 63.6 | 190 | 62.5  | 0.83 |

---

Note: TMP/Sulfa = trimethoprim-sulfamethoxazole

\* Confirmed=absence of established MRSA risk factors confirmed by patient interview,  
 Probable = absence of established MRSA risk factors by medical record review and  
 unsuccessful interview attempts.

\*\* blood, cerebral spinal fluid, pleural fluid, peritoneal fluid, synovial fluid, and bone.

† % = (no. susceptible / no. tested for agent) \* 100

‡ 1 isolate tested non-susceptible by automated testing methods but was not confirmed as  
 non-susceptible as recommended.<sup>37,38</sup>
